# Supplementary material for: Synthesis of a new highly sensitive near-infrared fluorescent iridium(iii) probe and its application for the highly selective detection of glutathione
Source: Royal Society of Chemistry journal article supplement (doi:10.1039/c5ra14847b), 2015-01-01
Supplement: c5ra14847b1.pdf [file c5ra14847b1.pdf]

## Supporting Materials

|                                                                           |     |
|---------------------------------------------------------------------------|-----|
| <sup>1</sup> H NMR spectrum of compound 1 in CDCl <sub>3</sub>            | S1  |
| <sup>13</sup> C NMR spectrum of compound 1 in CDCl <sub>3</sub>           | S2  |
| <sup>1</sup> H NMR spectrum of compound 2 in DMSO- <i>d</i> <sub>6</sub>  | S3  |
| <sup>13</sup> C NMR spectrum of compound 2 in DMSO- <i>d</i> <sub>6</sub> | S4  |
| <sup>1</sup> H NMR spectrum of compound probe 1 in CDCl <sub>3</sub>      | S5  |
| <sup>13</sup> C NMR spectrum of probe 1 in CDCl <sub>3</sub>              | S6  |
| HRMS spectrum of compound 1                                               | S7  |
| HRMS spectrum of compound 2                                               | S8  |
| HRMS spectrum of probe 1                                                  | S9  |
| Choice of solvents ratio of EtOH with H <sub>2</sub> O for probe 1        | S10 |

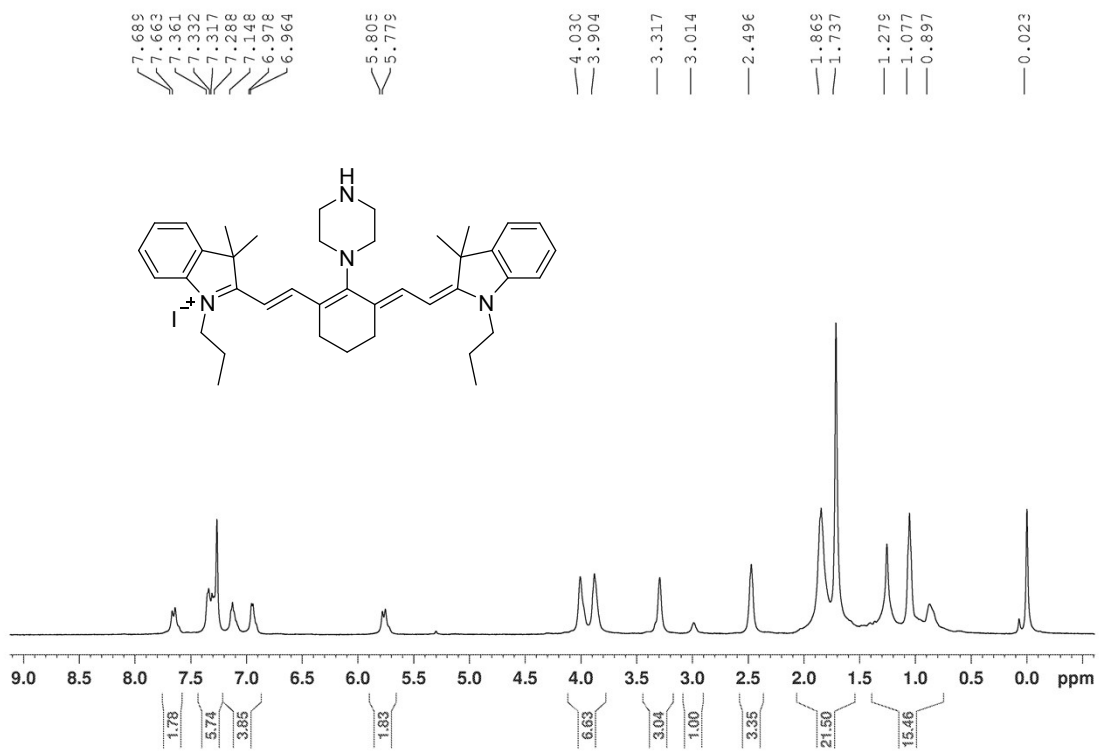

Fig. S1 <sup>1</sup>H NMR spectrum of compound 1 in CDCl<sub>3</sub>

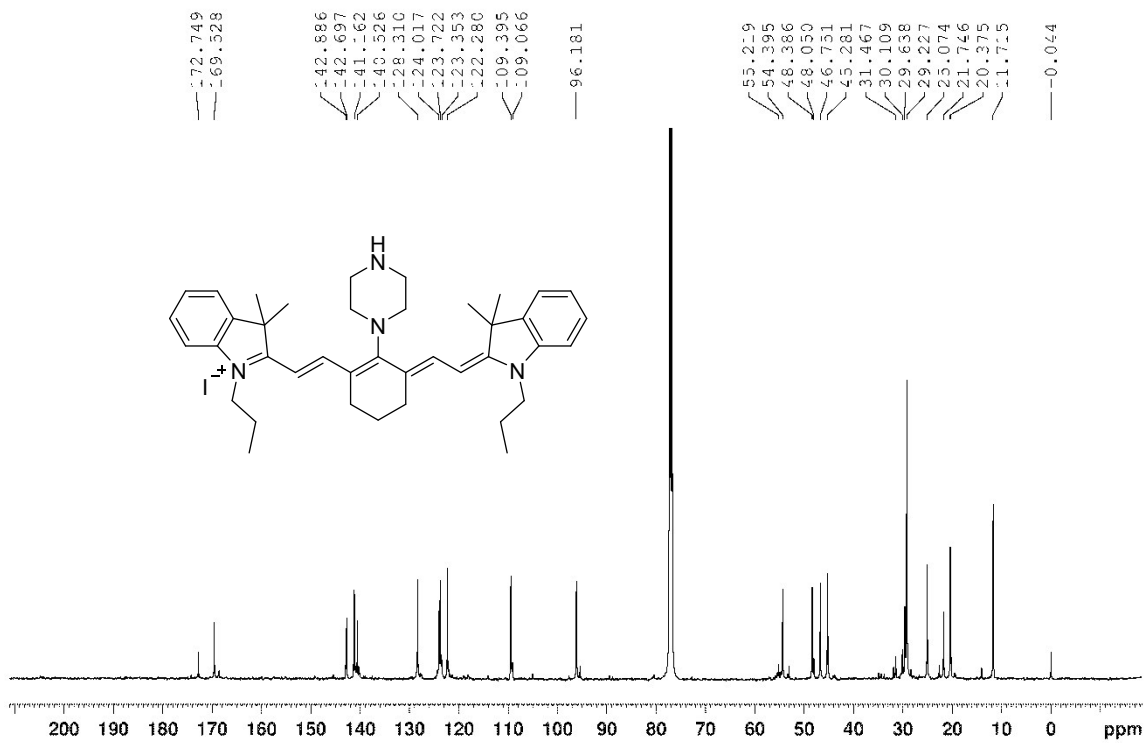

Fig. S2 <sup>13</sup>C NMR spectrum of compound 1 in CDCl<sub>3</sub>

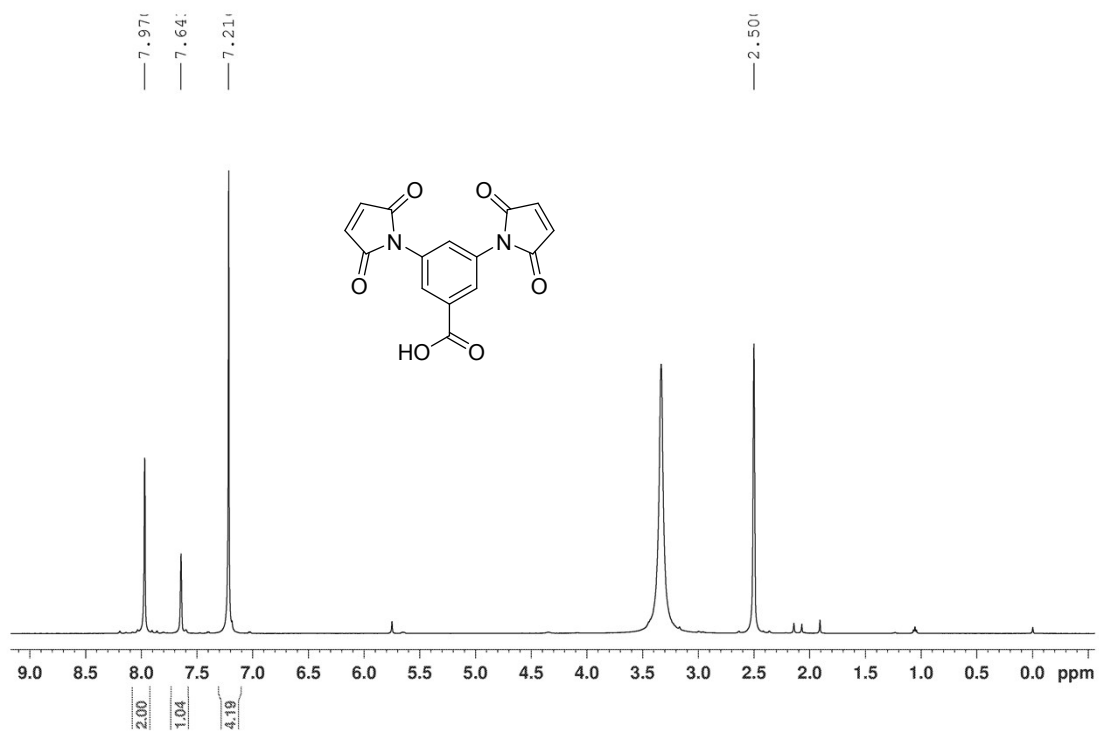

Fig. S3 <sup>1</sup>H NMR spectrum of compound 2 in DMSO-*d*<sub>6</sub>

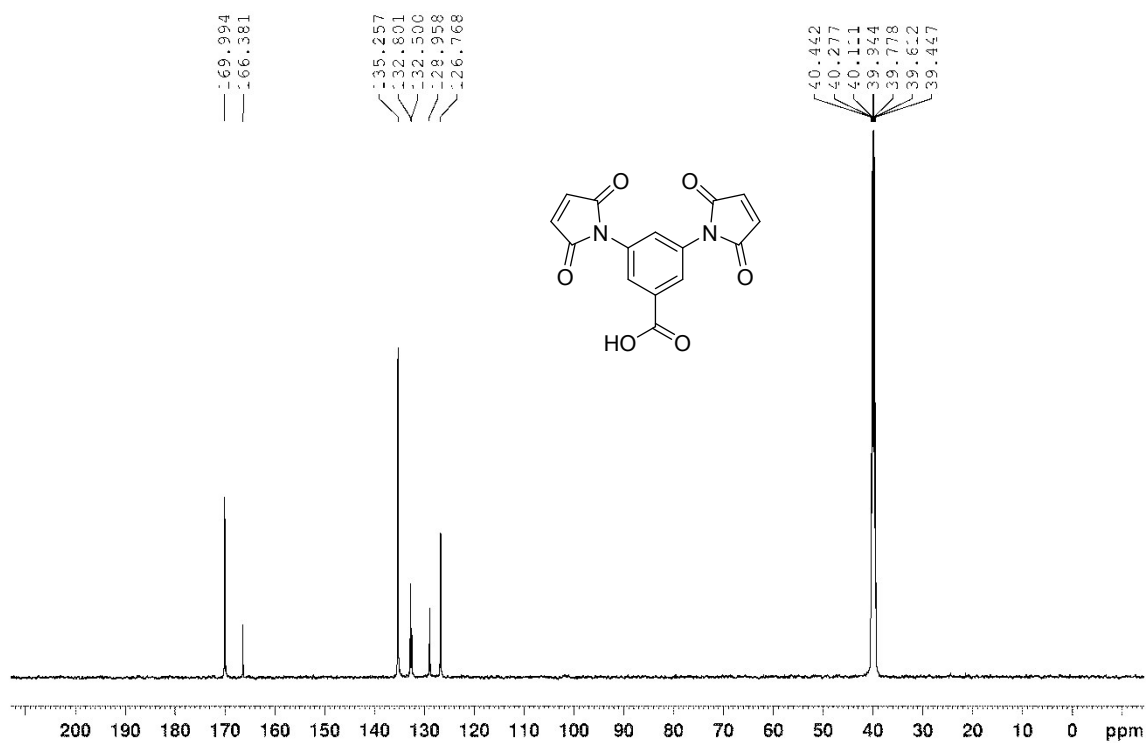

Fig. S4 <sup>13</sup>C NMR spectrum of compound 2 in DMSO-*d*<sub>6</sub>

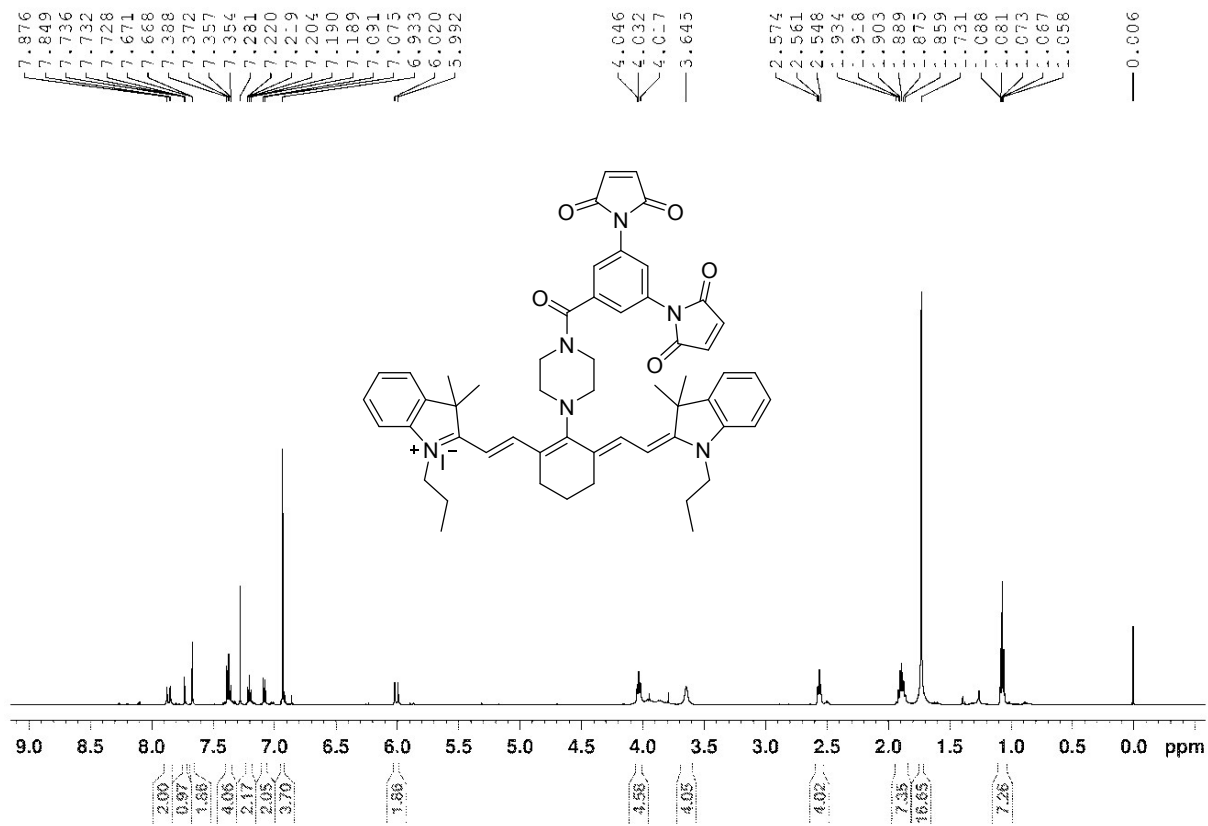

**Fig. S5** <sup>1</sup>H NMR spectrum of compound 1 in CDCl<sub>3</sub>.

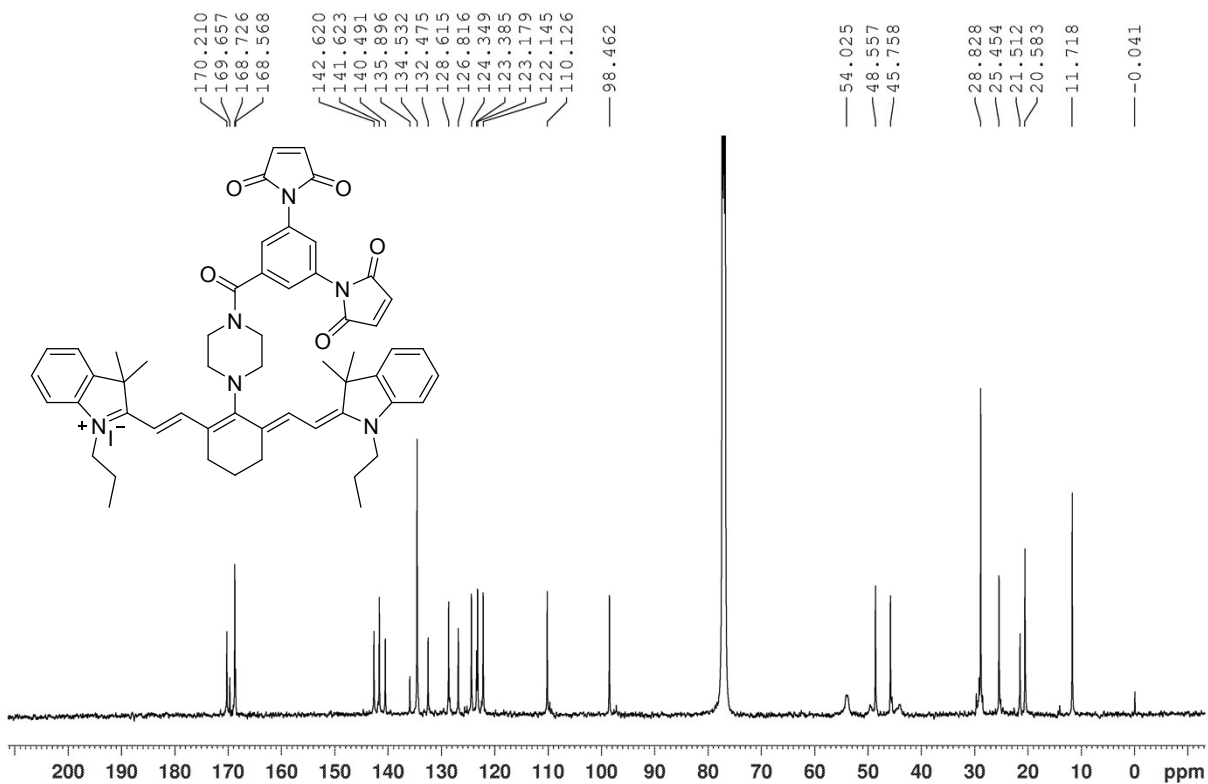

**Fig. S6** <sup>13</sup>C NMR spectrum of probe 1 in CDCl<sub>3</sub>



SAMPLE-150831-04 363 (6.779)

TOF MS ES-  
9.60e3

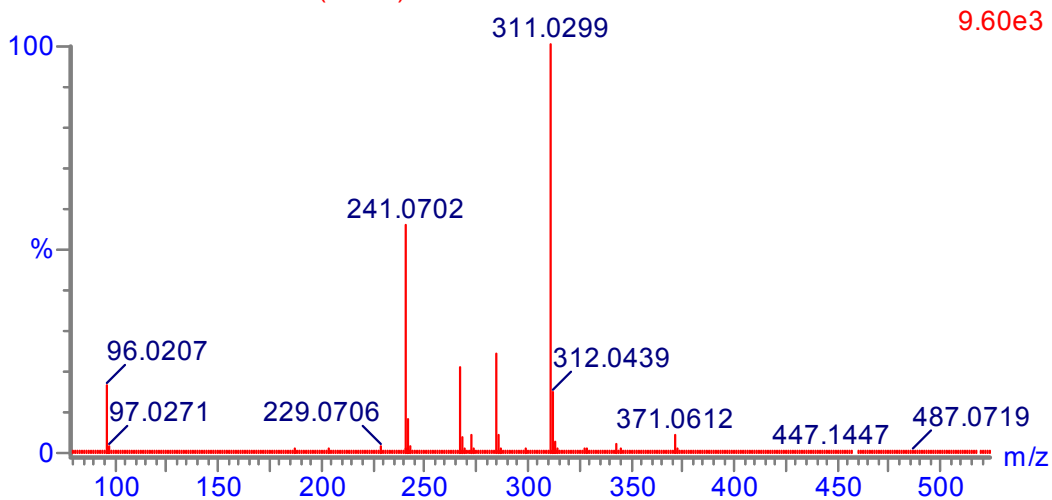

Fig. S8 HRMS spectrum of compound 2

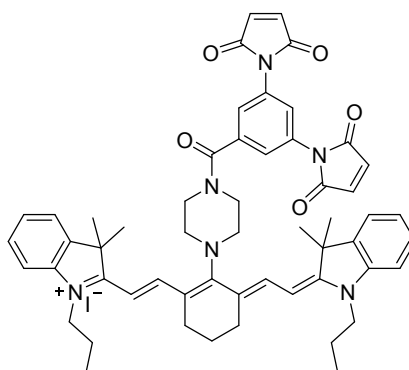

SAMPLE-140723-01 96 (1.790)

TOF MS ES+  
866

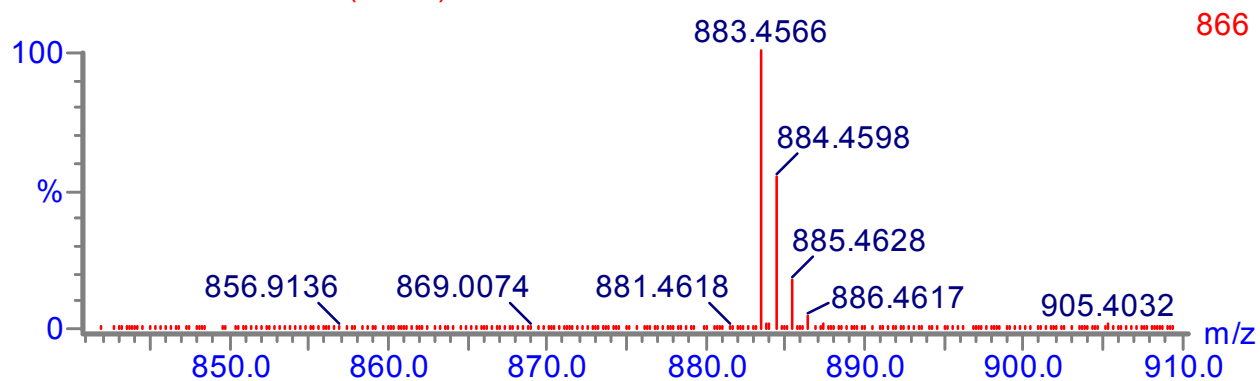

SAMPLE-140723-02 81 (1.501)

TOF MS ES-  
1.16e3

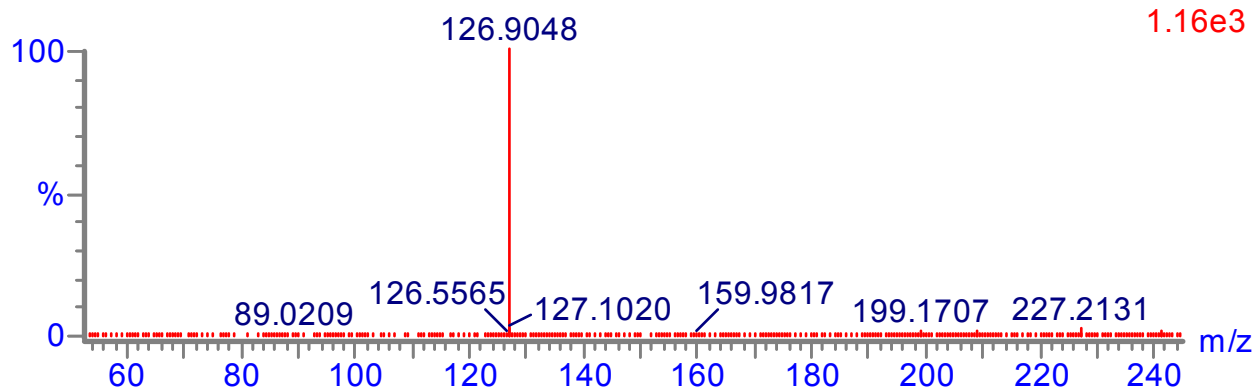

Fig. S9 HRMS spectrum of probe 1

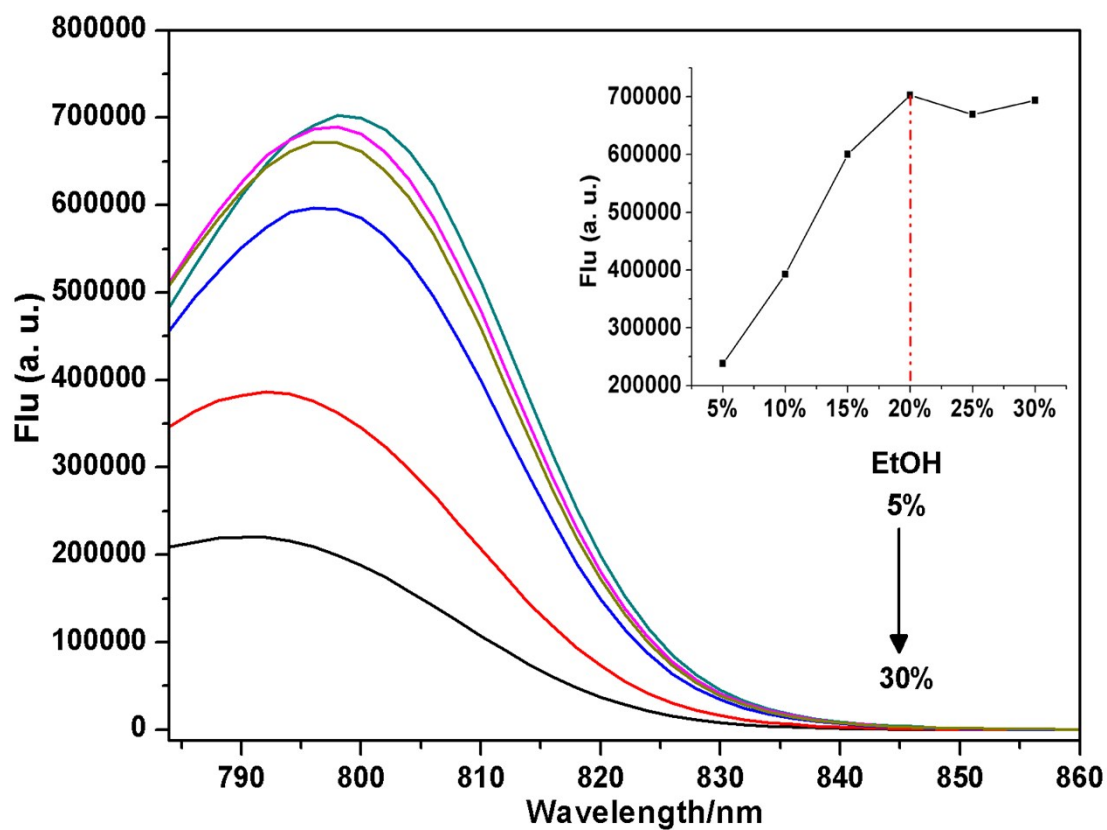

Fig. S10 Choice of solvents ratio of EtOH with H<sub>2</sub>O for probe 1
